# Supplementary material for: Long-Term Results of Endovascular Treatment with Nitinol Stents for Femoropopliteal TASC II C and D Lesions
Source: MDPI journal article supplement (doi:10.3390/medicina58091225), 2022-09-05
Supplement: s1 [file s1]

**Table S1.** Cox-regression analysis of factors associated with loss of secondary patency

| Loss of Secondary Patency        | Unadjusted<br>HR (95% CI) | <i>p</i> -value | Adjusted*<br>HR (95% CI) | <i>p</i> -value |
|----------------------------------|---------------------------|-----------------|--------------------------|-----------------|
| TASC II D lesion                 | 0.99 (0.53 – 1.84)        | 0.97            |                          |                 |
| Chronic total occlusion          | 1.74 (0.73 – 4.15)        | 0.21            |                          |                 |
| Lesion length > 25 cm            | 1.05 (0.56 – 1.96)        | 0.88            |                          |                 |
| Lesion length > 30 cm            | 0.98 (0.43 – 2.21)        | 0.73            |                          |                 |
| Previous intervention            | 0.94 (0.46 – 1.94)        | 0.87            |                          |                 |
| Reference vessel diameter < 5mm  | 0.58 (0.30 – 1.15)        | 0.12            |                          |                 |
| Severe calcification             | 0.77 (0.35 – 1.67)        | 0.51            |                          |                 |
| Stenosis free outflow vessels >1 | 0.53 (0.28 – 1.01)        | 0.05            | 0.51 (0.27 – 0.96)       | 0.04            |
| Rutherford cat. 5 or 6           | 1.77 (0.84 – 3.72)        | 0.13            |                          |                 |
| No. of Stents > 4                | 1.09 (0.58 – 2.02)        | 0.66            |                          |                 |
| Stent diameter > 6mm             | 0.94 (0.50 – 1.78)        | 0.86            |                          |                 |
| Stent oversizing > 1mm           | 0.98 (0.51 – 1.86)        | 0.94            |                          |                 |
| Popliteal stenting               | 0.63 (0.30 – 1.32)        | 0.22            |                          |                 |
| Re-entry device used             | 0.59 (0.18 – 1.92)        | 0.38            |                          |                 |
| Trans-popliteal access           | 1.43 (0.73 – 2.82)        | 0.30            |                          |                 |
| Distal embolization              | 1.19 (0.37 – 3.86)        | 0.78            |                          |                 |
| > 1 local complication           | 1.74 (0.53 – 5.73)        | 0.36            |                          |                 |

\* Variables identified in univariate analysis ( $p \leq .15$ ) were included in a multivariate Cox proportional hazards model for associations with loss of secondary patency.

**Table S2.** Complications.

|                                     | N=103, 109 lesions |
|-------------------------------------|--------------------|
| Overall complications               | 45                 |
| Patients with $\geq 1$ complication | 7 (7)              |
| Local complications                 | 35                 |
| - Distal embolization               | 7                  |
| - Minor amputation                  | 12                 |
| - Pseudo aneurysm                   | 2                  |
| - Surgery for acute bleeding        | 4                  |
| - Vessel perforation                | 10                 |
| Systemic complications              | 10                 |
| - Anemia                            | 5                  |
| - Congestive heart failure          | 2                  |
| - Renal function deterioration      | 3                  |
